1 **The Use of Biogeographical Patterns to Assess Key Adaptations in Two Families of Birds**

2  
3  
4 Abdel Halloway<sup>1</sup>, Christopher J. Whelan<sup>1</sup>, Çağan H. Şekercioğlu<sup>2</sup>, and Joel S. Brown<sup>3</sup>

5  
6  
7  
8 <sup>1</sup>Department of Biological Sciences, University of Illinois at Chicago  
9 845 W. Taylor St. (M/C 066) Chicago, IL 60607

10  
11 <sup>2</sup>Department of Biology, University of Utah  
12 257 South 1400 East, Rm. 201, Salt Lake City, UT 84112-0840

13  
14 <sup>3</sup>Integrated Mathematical Oncology, Moffitt Cancer Center  
15 SRB-4, 12902 USF Magnolia Drive Tampa, FL 33612

16  
17 **Corresponding Author**

18 Abdel Halloway  
19 Department of Biological Sciences, University of Illinois at Chicago  
20 845 W. Taylor St. (M/C 066) Chicago, IL 60607  
21 [ahallo2@uic.edu](mailto:ahallo2@uic.edu)

22  
23  
24 **Keywords**

25 Biogeography, Key Adaptations, Sunbird, Hummingbird, Sphingidae, Nectariniidae  
26

27 **Abstract**

28           Adaptations can be thought of as evolutionary technologies that allow organisms to  
29 exploit their environment. Like human technologies, adaptations can be 'progressive', increasing  
30 in their ability to accomplish a task. Progressive adaptations which also fundamentally alter the  
31 rules of trade-offs are known as key adaptations. Key adaptations allow a taxon to expand its  
32 niche space thereby radiating to larger species numbers and spread beyond its original range. If  
33 so, then of two otherwise ecologically equivalent taxa, the one with the greater geographical  
34 range may have a key adaptation. We tested this hypothesis by comparing the global  
35 biogeographic patterns of hummingbirds (Trochilidae) and sunbirds (Nectariniidae), ecologically  
36 equivalent families with distinct evolutionary technologies. Though many species of both  
37 families feed on nectar, hummingbirds also possess adaptations permitting hovering flight. We  
38 analyzed each family's species diversity with latitude and elevation, charting how they decline  
39 with movement towards poles and peaks. Hummingbirds persist into higher elevation and more  
40 extreme latitudes than sunbirds, reaching their 50% species richness value at 22.14° and 2087 m  
41 versus 18.92° and 2533 m for sunbirds. Looking at morphology, the evolution of hovering is  
42 likely the constraint breaking adaptation that allowed hummingbirds to radiate into more species  
43 and inhabit more extreme climates than sunbirds. Comparing the biogeography of ecologically-  
44 equivalent taxa has the potential to reveal insights into the species adaptations and niche  
45 expansion.

46

## 47 **Introduction**

48           The traits possessed by a species govern the types of environments it can exploit – its  
49 fundamental niche. Evolution by natural selection shapes the traits of species to optimize fitness  
50 by tailoring an organism’s morphology, physiology, and behavior to their environments (Darwin,  
51 1859). Such traits – or adaptations – can be thought of as “evolutionary technologies” that allow  
52 an organism to operate within an environment. An organism’s adaptations add up to a suite of  
53 technologies that allows it to persist in its fundamental niche. As many habitats across the world  
54 display remarkable similarity in environmental condition, species within these similar habitats  
55 have evolved similar adaptations, a process known as convergent evolution (Mooney and Dunn,  
56 1970). If the full suite of evolutionary technologies of multiple different species are similar  
57 enough to each other and the species exist within similar niches, the species are deemed to be  
58 ecological equivalents, species that occupy a similar fundamental niche space and fulfill similar  
59 functional roles (Biggins et al., 2011). Examples are found within taxa as diverse as weasels  
60 (Biggins et al., 2011), desert snakes, rodents (Montgomery, 1989; Mares, 1975), and epiphytes  
61 (Bennet, 1986).

62           Like human technologies, evolutionary technologies are not perfect in their ability to  
63 accomplish a task, these imperfections relaying costs to the organism. The costs may be concrete  
64 – such as the energy and material needed to maintain the adaptation – or abstract – such as the  
65 lack of information that comes from a less than perfect adaptation (Kotler and Mitchell, 1995).  
66 The costs derived from evolutionary technologies lead to trade-offs that a species must negotiate  
67 if it is to optimize its fitness. Yet like human technologies, evolutionary technologies can be  
68 progressive, increasing their ability to accomplish a specific task (Dawkins, 1997). If an  
69 adaptation is not only progressive but also fundamentally changes the rules of the trade-offs, it is

70 known as a key adaptation (Rosenzweig and McCord, 1991; Galis, 2001). An example of a key  
71 adaptation would be the evolution of wood. To grow taller, plants must accumulate tissue to  
72 support the extra weight. Wood, a non-living tissue, allows plants to grow taller without the need  
73 maintain the tissue. Trade-offs are not eliminated – it takes much longer to create wood  
74 compared to living tissue – but instead altered such that woody plants are favored in  
75 environments with infrequent disturbance.

76 Looking across evolutionary history, the evolution of a key adaptation often leads to the  
77 radiation of a new, more speciose clade – now defined by its synapomorphy – often replacing the  
78 older, ecologically-equivalent clade from which it came. This replacement process – known as  
79 incumbent replacement – has been seen in turtles (Rosenzweig and McCord, 1991), native and  
80 introduced marsh snails (Berman and Carlton, 1991), spiriferacean brachiopods (McGhee, Jr.,  
81 1981) and more. More importantly, the evolution of adaptations which reduce the cost of trade-  
82 offs allow the clade to expand niche space and corresponding biogeographical range (Holt et al.,  
83 1997). This effect can be seen with the *Peromyscus* and *Apodemus* genera of mice. *Peromyscus*  
84 has a better and more widely used torpor state which allows species within the genera to inhabit  
85 colder, more arid, and elevationally higher habitats compared to the ecologically equivalent  
86 genus *Apodemus* (Morhardt, 1970; Walton and Andrews, 1981; Montgomery, 1989). With this  
87 relationship of key adaptations leading to more speciose clades with a larger geographical extent,  
88 it may imply the reverse: among ecologically equivalent clades, the one with the greatest species  
89 richness and biogeographical range should possess superior evolutionary technologies.

90 One test of the presence of key adaptations within a clade has been to compare the  
91 species richness between taxa (Galis, 2001). However, of the two properties of species richness  
92 and biogeographical extent that define a clade, biogeographical extent is theoretically more

93 useful when comparing strength of evolutionary technologies: the larger the biogeographical  
94 extent, the greater the range of environmental and ecological variables with which a clade has to  
95 deal in most cases. Therefore, any comparison between taxa based upon biogeographical extent  
96 more explicitly compares the strength of the evolutionary technology within the clades and the  
97 possibility of key adaptations versus simple species richness alone. Comparing biogeography  
98 should work best when comparing extant, non-sympatric, ecologically equivalent taxa due to an  
99 incomplete fossil record and the possibility of competition otherwise.

100         While there is extreme variation in many biogeographic patterns, latitudinal and  
101 elevational gradients in species richness are robust geographic patterns found among nearly all  
102 taxa (Terborgh, 1977; Graham, 1983; Rosenzweig, 1995; Kaufman, 1995; Sánchez-Cordero,  
103 2001; Sanders, 2002; Hillebrand, 2004). Generally, as one moves from low latitudes or  
104 elevations towards the poles and higher elevations respectively, the species richness of a taxon  
105 declines. Numerous properties change along the two gradients. Both gradients show declines in  
106 productivity and temperature averages and increases in seasonal temperature variation. Only  
107 species with superior evolutionary technologies are able to mitigate the costs of colder  
108 temperatures and reduction of exploitable resources (Buckley et al., 2012). Elevational gradients  
109 also include the properties of declining atmospheric pressure, an especially critical resource for  
110 metazoans, and increasing daily temperature variation. These additional factors mean that taxa  
111 should show a clearer response to elevation dependent upon their evolutionary technologies.

112         To this end, we analyzed at the latitudinal and elevational distribution of two convergent  
113 families of nectarivorous birds, hummingbirds (Trochilidae) and sunbirds (Nectariniidae), to see  
114 if and what their biogeography can tell us about the strength of their adaptations. Both families  
115 show adaptations to a nectarivorous environment, namely elongated bills and tongues with

116 lamellae-like structures, with the hummingbirds displaying a stronger mutualistic co-adaptation  
117 with flowers compared to sunbirds, suggesting the presence of a key adaptation within the taxon  
118 (Johnsgard, 1997, Cheke and Mann, 2001). These features, combined with the hemispheric  
119 separation and differences in species richness, indicate that hummingbirds and sunbirds are well-  
120 suited for biogeographic comparisons to determine key adaptation strength. In this study, we  
121 seek to ask several questions. Do hummingbirds extend farther latitudinally and elevationally  
122 than sunbirds? What does the shape of their distribution tell us about their interactions with the  
123 environment? And more generally, will a difference in biogeography and species richness  
124 between ecologically equivalent taxa indicate the presence of a key adaptation in one of the taxa?

## 125 **Materials and Methods**

### 126 Study Families

127 Hummingbirds (order Apodiformes, family Trochilidae) and sunbirds (order  
128 Passeriformes, family Nectariniidae) are two families of nectarivorous birds. There are  
129 approximately 365 hummingbird species all located in the New World (BirdLife International,  
130 2015) with a latitudinal extent from Alaska to Argentina. Hummingbirds are the most specialized  
131 of all the nectar feeding birds, all feeding almost exclusively on nectar and only supplementing  
132 protein intake by eating small insects (Yanega and Rubega, 2004). Due to this tight co-  
133 adaptations between food and forager, hummingbirds have evolved distinct anatomical and  
134 morphological features suited to nectar foraging. Such features include elongated bills and  
135 extensile, bifurcated, tubular tongues that acts as micro-pumps for reaching and gathering nectar,  
136 large breast muscles (30% of body weight) and specialized wings giving them the ability to  
137 hover and fly backwards, and a dense erythrocyte count delivering a steady supply of oxygen to  
138 feed extremely active muscles (Johnsgard, 1997; Rico-Guevera and Rubega, 2011; Rico-Guevera

139 et al., 2014).

140 One-hundred-twenty-four sunbird species (family Nectariniidae) exist worldwide  
141 (BirdLife International, 2015). All of them occur in the Old World, specifically Africa, mainland  
142 Asia, the Indonesian Archipelago, and much of Australasia. Their latitudinal range stretches from  
143 the southern tip of Australia to as far north as Lebanon and the Himalayas. Though the family of  
144 sunbirds contain a large number of nectar feeders, the co-adaptation between food and forager is  
145 not as tight as hummingbirds. Many species will supplement their diet with insects, seeds, fruit,  
146 and flower heads. As expected, there is large variation in morphology based on each species'  
147 relationship with nectar. Sugarbirds and most true sunbirds have long bills with some adapted  
148 specific flower species and long, tubular, bifurcated tongues with serrated edges similar to  
149 hummingbirds. Flowerpeckers and the *Hedydipna* and *Hypogramma* sunbirds have broad, flat  
150 tongues as they are less specialized to nectar feeding. Though some species can hover in front of  
151 flowers when feeding, sunbirds generally lack the breast muscle architecture found in  
152 hummingbirds with most perching to feed; those less specialized to nectar feeding will typically  
153 nectar-rob, entering the flower through the side rather than the front (Cheke and Mann, 2001).

#### 154 Methods

155 To determine the presence of key adaptations within the family of hummingbirds, we  
156 assessed the latitudinal and elevational gradients of both families. Besides the expected  
157 relationship with the strength of adaptations, latitudinal and elevational gradients have many  
158 features that make particularly useful for this analysis. Firstly, the commonality of latitudinal and  
159 elevational gradients of species richness brings a robustness and consistency to the analysis by  
160 standardizing the comparison. Secondly, spatial comparisons over a wide geographic range are  
161 better able to indicate the presence of key adaptations as they cover many environmental

162 variables – reducing the chance of a false negative – but are not inherently correlated to the  
163 adaptation in question – preventing false positives. (Admittedly, spatial analysis does not tell us  
164 what the key adaptation is or what it is adapted towards, something which looking at a suite of  
165 environmental variables would indicate). Additionally, elevational comparisons offer a stronger  
166 comparison between families. This is because a purely random process of range size and position  
167 determination within a bounded geographical space of a group of species will generate a hump-  
168 shaped gradient resembling, but not similar to, latitudinal gradients (Willig and Lyons, 1998).  
169 Elevational gradients occur in bounded geographical space but present a skewed distribution  
170 indicating the lack of random processes. Therefore, any difference between the families is almost  
171 definitely an effect of their natural histories.

172         To create latitudinal and elevational gradients with which compare the two families, we  
173 used the latitudinal and elevational range of each species. Elevational ranges were taken from a  
174 database on the ecology and biogeography maintained by Çağan H. Şekercioğlu and used as is.  
175 Two different latitudinal gradients were analyzed: latitude as is and “polewardness,” a measure  
176 of distance from the equator. Latitudinal ranges of the families were taken from shapefiles  
177 downloaded from BirdLife International (2015) – data extracted using R – and used for the first  
178 measure as is except for converting southern latitudes to negative values. To create the second  
179 measure of polewardness, the maximal and minimal latitudinal range of each species was  
180 extracted and rounded up and down respectively to the nearest integer. For example, the  
181 hummingbird species *Amazilia amabilis* which ranges from 14.17N to 3.98S would have its  
182 range modified to 15N and 4S. If the range then crossed the equator, then the range was taken to  
183 be from 0 to the maximum distance from the equator, effectively ‘folding’ the range at the  
184 equator.. In the previous example, this would mean the poleward range would be 0 to 15 degrees.



185 A species which exists only in the Northern or Southern hemisphere would simply have its  
186 poleward range as the absolute value of its latitudinal range.

187 With the latitudinal, poleward, and elevational ranges, we analyzed the families in two  
188 ways. First, we compared several empirical cumulative distribution functions (ECDFs) based  
189 upon the three geographical properties (elevation, latitude, and polewardness) for each family. To  
190 create the ECDFs, we assumed a species to be present depending upon three different points in  
191 the range: the minimum, maximum, and central points. Central points were usually determined  
192 by taking the midpoint of each range which assumes a symmetrical abundance distribution. Since  
193 polewardness had the folding property, we created an extra measure of centrality, expected  
194 polewardness. For species whose ranges crossed the equator, we assumed that abundance was  
195 stacked creating a new distribution (abundance was assumed to be uniform for easier  
196 calculation). We then calculated the expected value of this stacked uniform distribution seen in  
197 eq. (1) where *min* and *max* stand for the absolute value of minimum and maximum latitude  
198 respectively.

$$199 \quad \frac{1}{2} * \frac{\min^2 + \max^2}{(\min + \max)} \quad (\text{Equation 1})$$

200 This lead to ten different ECDFs for each family: minimum elevation, maximum  
201 elevation, midpoint elevation, minimum latitude, maximum latitude, midpoint latitude, minimum  
202 polewardness, maximum polewardness, midpoint polewardness, and expected polewardness.  
203 Each type of ECDF was then compared between families using two different minimum  
204 difference estimation (MDE) tests, the Kolmogorov-Smirnov and Anderson-Darling tests, with  
205 the assumption that of hummingbird ECDF is less than the sunbird ECDF (one-tailed tests). We  
206 feel that the ECDFs based upon central points were most accurate as they were neither under nor

207 over conservative. This method of analysis tells us with statistical certainty whether the  
208 distributions differ, though not necessarily how they differ.

209         Second, to characterize each family's distribution, we intervals of 5 degrees for  
210 polewardness and half kilometers for elevation and counted the number of species for each  
211 family in each interval. If a species' range was the cutoff point of the interval, it would be  
212 considered as present in the lower interval but not in the upper interval due to previous rounding.  
213 In the example with *A. amabilis*, this would mean that the species would exist in the 10 to 15  
214 degree interval but not the 15 to 20 degree interval. With the data on the two families' species  
215 richness vs the two ranges, the data were then normalized such that the interval with the highest  
216 number of species became 1 to remove the effect of species richness. This gave us four sets of  
217 data based on a 2x2 factorial: sunbird and hummingbird vs. latitude and elevation. A logistic  
218 function (eq. 2) was then fitted onto each of the four sets of data – the proportional species  
219 richness,  $S_p$ , per interval vs. the midpoint of each interval – with variables  $a$  and  $b$  determining  
220 position and steepness respectively.

221                     
$$S_p = \frac{1}{1+ae^{bx}} \quad \text{(Equation 2)}$$

222         With each function characterized, we then found the specific inflection points (eq. 3),  
223 which corresponded to the point at which species richness was half of maximum species  
224 richness, and the roots of the third derivative (jerk points) (eq. 4) and points of maximum  
225 magnitude of curvature (MMC points), both of which corresponded to the start and end of the  
226 decline of species richness. Since MMC points have no explicit solution, we instead estimated  
227 them by searching over the positive number line with R. Using these points, we characterized  
228 how species richness declines in each family with elevation and polewardness.

229 
$$x = \frac{1}{b} \log \left( \frac{1}{a} \right) \quad (\text{Equation 3})$$

230 
$$x = \frac{1}{b} \log \left( \frac{2+\sqrt{3}}{a} \right) \quad (\text{Equation 4})$$

231 This second method of analysis with functions and points now characterize the shape of  
232 each family's gradient.

### 233 **Results**

234 Broadly, our results show that hummingbirds extend further poleward and higher in  
235 elevation than sunbirds. Hummingbirds extend from as far north as 62 degrees to as far south as  
236 56 degrees and up to 5000m in elevation. Sunbirds, on the other hand, extend only from 36  
237 degrees north to 40 degrees south and up to 4880m in elevation (Table 1). Both families show the  
238 same general pattern of initial increase in species richness from the equator and sea-level, both  
239 reaching their maximum in the 5-10 degree and 500-1000m intervals, before declining (Fig. 2).  
240 Inspecting the figures, we can see that hummingbirds are able to maintain proportional species  
241 richness at higher levels than sunbirds but in different ways with regards to elevation and  
242 latitude.

### 243 **ECDF Results**

244 The ECDF results broadly show that hummingbird and sunbird distributions differed  
245 across all measures (Table 2). The only measures that returned values of non-significance were  
246 the measures based upon the maximum latitude of each species' range. The centrality based  
247 ECDFs all returned significant values. Elevational ECDFs gave the greatest degree of difference  
248 and the smallest p-values, followed by poleward ECDFs, then simple latitude ECDFs. With the  
249 confirmation of difference in elevational and latitudinal distributions between hummingbirds and  
250 sunbirds, we turn to characterizing the differences.

251 Elevation

252 Both hummingbirds and sunbirds reach approximately the same maximum elevation,  
253 around 5000m (Table 1a, Fig. 2a). With our fitted functions, we see that even though both  
254 hummingbirds and sunbirds extend to roughly the same elevation, hummingbirds are able to  
255 maintain higher proportional species richness at higher elevations compared to sunbirds. For  
256 sunbirds, the relationship with elevation is  $S_p = 1/1 + 0.006546e^{2.409634 * ELEV}$ ; for  
257 hummingbirds,  $S_p = 1/1 + 0.02024e^{1.53943 * ELEV}$  (Table 3). Looking at the inflection points, we  
258 see that sunbirds reach 50% of maximum species richness at 2087m in elevation with  
259 hummingbirds reaching theirs at 2533m. Sunbirds and hummingbirds both start their decline  
260 around the same elevation – 1540m and 1678m respectively using the jerk, 1764 and 1898m  
261 using MMCs – but sunbirds end their decline at a lower elevation compared to hummingbirds –  
262 2634m vs. 3385m respectively according to the jerk, 2410m vs. 3458m according to the MMCs –  
263 indicating a more gradual decline in proportional species richness for hummingbirds (Table 4,  
264 Fig 2b.).

265 Latitude

266 Unlike the case of elevation, hummingbirds reach further from the equator than sunbirds,  
267 60-65 degrees vs. 35-40 degrees respectively (Table 1b, Fig. 2b). Also unlike elevation,  
268 hummingbird proportional species richness is at its greatest divergence from sunbird  
269 proportional species richness at mid-latitudinal ranges. For hummingbirds, the relationship  
270 equation is  $S_p = 1/1 + 0.019757e^{0.177253 * ELEV}$  and for sunbirds,  
271  $S_p = 1/1 + 0.077829e^{0.134976 * ELEV}$  (Table 3). Hummingbirds reach 50%  $S_p$  at 22.14 degrees  
272 latitude, later than the 18.92 degrees of sunbirds. Hummingbirds also begin their declines later  
273 than sunbirds – 14.71 and 9.16 degrees respectively using the jerk, 14.99 and 9.44 degrees using

274 MMC. Both stop the decline around the same latitude – 29.57 vs. 28.67 degrees according to the  
275 jerk, 29.29 vs. 28.39 degrees according to the MMC – confirming the steeper but later decline of  
276 hummingbirds (Table 4, Figure 2d).

## 277 **Discussion**

278 Sunbirds and hummingbirds are two convergent nectarivorous families of birds with  
279 various evolutionary technologies for their feeding operations. While hummingbirds are  
280 extremely specialized to their nectar feeding diet, sunbirds vary in specialization ranging from  
281 the hummingbird-like sugarbirds to the passerine-like flowerpeckers (Johnsgard, 1997; Cheke  
282 and Mann, 2001). These differences in evolutionary technologies should reflect differences in the  
283 respective families' distribution and biogeography. Species richness of hummingbirds show  
284 greater resilience compared to sunbirds as one moves higher in elevation and away from the  
285 equator. With regards to elevation, hummingbirds and sunbirds extend to the same elevational  
286 height, approximately 5000m, but proportional hummingbird species richness holds up much  
287 better at higher elevations when compared with sunbirds, declining at a slower rate until they  
288 reach the same species richness at 5000m. With regards to latitude, though not as striking a  
289 difference, hummingbirds do show greater robustness compared to sunbirds, especially  
290 noting that hummingbirds extend further north and south than sunbirds. Our results give  
291 additional evidence to the correlation between a taxa's species richness and geographic range.

292 One potential hypothesis for the differences in biogeography between hummingbirds is  
293 dispersal limitation. In the Old World, many of the mountain ranges run along the east-west axis  
294 while New World mountains run in a north-south manner. The Old World mountains may form  
295 barriers which prevent sunbirds from extending as far north as hummingbirds; certainly, lack of  
296 land prevents sunbirds from extending as far south. We, though, reject the dispersal limitation

297 argument on two key grounds. Firstly, hummingbirds are still more speciose than sunbirds. Of  
298 the 365 species, only 15 hummingbirds are found in the latitudinal range where sunbirds are not.  
299 Even if we assume that expansion into the northern latitudes led to the creation of all 15 species,  
300 it still only accounts for approximately 4% of hummingbird species. Clearly the differences in  
301 species richness of the families are not due to range expansion. This implies that greater  
302 geographic range followed greater speciosity and not vice-versa if dispersal limitation were a  
303 factor. Secondly, hummingbirds are able to deal well with mountains. Not only do hummingbirds  
304 maintain species richness at higher elevations as our study showed, they have higher species  
305 richness in the mountains of western North and South America compared to the flat-lying eastern  
306 regions and frequently migrate along these routes. Instead, we feel that the evidence is highly  
307 suggestive of one or more key adaptations in hummingbirds.

308         There are many similarities between hummingbirds and highly specialized sunbirds,  
309 making them ecological equivalents, but they do differ in specific areas. It is within these  
310 differences where hummingbirds' key adaptation should lie. Likely, the key adaptation deals with  
311 the manner of foraging, specifically feeding and flight. With regard to feeding, one possibility for  
312 hummingbirds' key adaptation may be their unique tongues. The tongues of hummingbirds have  
313 recently been shown to act as micropumps, a way of quickly and efficiently gathering nectar  
314 from flowers versus the previous assumption of capillary action (Rico-Guevera and Rubega,  
315 2011; Rico-Guevera et al., 2014). This unusual method of nectar-gathering may allow  
316 hummingbirds to more efficiently gather nectar compared to sunbirds. Not enough is known  
317 about sunbird tongues though to see how the two taxa compare in nectar gathering abilities.  
318 Studies indicate that hummingbirds and sunbirds gather nectar at seemingly comparable rate  
319 suggesting that the amount gathered is not the key difference (Hainsworth, 1973; Schlamowitz et

320 al., 1976; Paton and Collins, 1989; Rico-Guevera et al., 2014 [pers. calc.]). If the tongue is the  
321 key adaptation, then it will be for the fact that micropumping requires no energy expenditure on  
322 the part of hummingbirds – removing a cost – while sunbirds apparently intake nectar through  
323 suction – a potentially energetically expensive system (Liversidge, 1967; Downs, 2004). Much  
324 more research needs to be done on the tongues of sunbirds to see how they compare with the  
325 tongues of hummingbirds.

326 Another possibility of the key adaptation that separates hummingbirds and sunbirds is  
327 hummingbird's ability to hover and fly in all directions more efficiently (Johnsgard, 1997).  
328 Adaptations for a hovering lifestyle include shortened arm bones (humerus, ulna, and radius) and  
329 longer hand bones, a relatively fixed V-shaped arm position, a shallow ball-and-cup joint  
330 between the coracoid and sternum, a large sternum with a deep keel onto which large breast  
331 muscles – pectoralis and supracoracoideus – attach, and red-blood cells and hemoglobin adapted  
332 for higher-oxygen affinity and carrying capability (Schuchmann, 1999; Chantler, 1999; Warrick  
333 et al., 2012; Zusi, 2013). All these anatomical features are adaptations to stiff-winged flight and  
334 seen to a lesser extreme within other bird families of the order Apodiformes (Schuchmann, 1999;  
335 Chantler, 1999; Zusi, 2013). What truly differentiates the flight of hummingbirds is the axial  
336 rotation of the humerus and wrist bones during flight (Zusi, 2013). Hummingbirds are able to  
337 create lift on the upstroke – in addition to the downstroke seen in all birds – due to wing  
338 inversion caused by axial rotation of the wrist (Warrick et al., 2012). Wrist flexibility comes from  
339 changes in carpal structure and deletion of key ligaments and is seen in birds outside of  
340 Apodiformes (Ros et al., 2011; Zusi, 2013; Parslew, 2015). In addition, additional power to each  
341 downstroke and upstroke comes from axial rotation of humerus, driven by the pectoralis,  
342 supracoracoideus, and other muscles (Hedrick et al., 2012; Warrick et al., 2012; Zusi, 2013). The

343 humerus is able to rotate up to 180° due to a unique humeroscapular joint (Ingram, 1978;  
344 Schuchmann, 1999). The key adaptation of this joint is the placement of the humeral head along  
345 the axis of the shaft instead of the terminal position, a feature only seen in hummingbirds (Karhu,  
346 1999; Videler, 2006). Together, this suite of adaptations allows hummingbirds to hover  
347 effectively when foraging.

348         It is currently unknown what the benefits to hovering may be. We speculate three possible  
349 reasons. Firstly, hummingbirds may be able to exploit the nectar of plants without perches,  
350 potentially opening up a new resource for them. As most nectarivorous birds need to perch while  
351 feeding, flowers without perches may represent a relatively abundant and constant resource  
352 without competition from other similar species. Evolution of hovering in this scenario may be a  
353 virtuous cycle as other hovering becomes more efficient at high nectar volumes which occur in  
354 the absence of competition (Dreisig, 1997). Secondly, hummingbirds may be able to escape  
355 predation due to their unique flying abilities. With the ability to fly in all directions,  
356 hummingbirds may be easily avoid predators, a useful ability especially when feeding at a flower  
357 with blocked sightlines (Lima, 1993). Finally, while hovering is energetically costly, it is also  
358 time efficient (Hainsworth, 1986). Hovering birds spend less time gathering resources at flowers  
359 than birds which rely on perches. This means that hovering becomes more energetically efficient  
360 compared to perching when birds feed within clustered flower patches (Pyke, 1981; Wolf and  
361 Hainsworth, 1983). The suite of evolutionary technologies may also benefit hummingbirds in  
362 secondary ways. For example, hummingbirds are able to sustain flight more efficiently at higher  
363 altitudes, likely due to their denser erythrocyte count, expanding their fundamental niche to  
364 higher elevations (Berger, 1974). What is clear though is that a hummingbird's adaptations for  
365 hovering – in particular, the movement of the humeral head from a terminal to axial position –



366 fundamentally changes the rules of their nectarivory; they exist as a new type of bauplan while  
367 sunbirds are still effectively a fancy passerine (Rosenzweig and McCord, 1991; Vincent and  
368 Brown, 2005). Coupling the fact that almost no hummingbird species is not a highly specialized  
369 nectarivore while many sunbirds range in their specialization with species richness and  
370 biogeographic data suggest hummingbirds have incumbently replaced their ancestral-type that  
371 was less specialized to nectar feeding.

372         There could be many reasons why hummingbirds developed their key adaptation.  
373 Hummingbirds underwent an expansive radiation during the uplift of the Andes beginning  
374 around 10mya (McGuire et al., 2014). Living in such harsh conditions could have necessitated  
375 the evolution of a more efficient foraging system. As mentioned earlier, greater oxygen capacity  
376 is beneficial to both hovering and living in low oxygen conditions. There is also the possibility  
377 that the rise of the Andes freed up niche space that would have otherwise been taken up by a  
378 competing family like hawkmoths (Sphingidae), a sort of ecological and evolutionary constraint  
379 (Halloway et al., 201X). Furthermore, sunbirds may face their own internal constraints, genetic  
380 or otherwise, preventing them from evolving a key adaptation (Arnold, 1992). Whatever the case  
381 may be, the evolution of this adaptation allowed hummingbirds to more efficiently take  
382 advantage of a resource and expand their species number and geographical range.

383         By comparing the biogeography of two convergent families of organisms, we can gain  
384 insight into the difference in evolutionary technologies between them. A taxon with higher  
385 species richness and a larger geographical range than its equivalent sister taxa is likely to have a  
386 key adaptation that allows it to achieve such species numbers and range extent. One possible  
387 example could be the American and European earthworms. European earthworms, having been  
388 introduced to North America, have colonized parts of North America that are farther north than

389 their American counterparts (Frelich et al., 2006). Both earthworms are ecological equivalents  
390 and have convergent features to fill the role of soil turners. This greater range could potentially  
391 mean that the European earthworms have some superior evolutionary technology that allows  
392 them to expand their range farther north than the native North American species.

393           Great insights into the nature of adaptations of ecologically equivalent taxa may be  
394 deduced from comparison of their geographic ranges. Our study provides a proof-of-concept for  
395 this hypothesis.

396 **References**

- 397 Arnold, S.J. 1992. Constraints on phenotypic evolution. *The American Naturalist* **140**:S85-S107
- 398 Bennet, B.C. 1986. Patchiness, diversity, and abundance relationships in vascular epiphytes.  
399 *Selbyana* **9**:70-75
- 400 Berger, M. 1974. Energiewechsel von Kolibris beim Schwirrflug unter Hoehenbedingungen.  
401 *Journal fuer Ornithologie* **115**:273-288
- 402 Berman, J. and J.T. Carlton. 1991. Marine invasion processes: interactions between native and  
403 introduced marsh snails. *Journal of Experimental Marine Biology and Ecology* **150**:267-  
404 281
- 405 Biggins, D.E., L.R. Hanebury, B.J. Miller, and R.A. Powell. 2011. Black-footed ferrets and  
406 Siberian polecats as ecological equivalents and ecological surrogates. *Journal of*  
407 *Mammalogy* **92**:710-720
- 408 BirdLife International and NatureServe (2015) Bird species distribution maps of the world.  
409 BirdLife International, Cambridge, UK and NatureServe, Arlington, USA.
- 410 Buckley, L., A.H. Hurlbert, and W. Jetz. 2012. Broad-scale ecological implications of ectothermy  
411 and endothermy in changing environments. *Global Ecology and Biogeography* **21**:873-  
412 885
- 413 Chantler, P. 1999. Family Apodidae (Swifts). Pages 388-417 in J. del Hoyo, A. Elliot, and J.  
414 Sargatal, editors. *Handbook of the Birds of the World, Vol.5*. Lynx Edicions, Barcelona,  
415 Spain.
- 416 Cheke, R.A. and C.F. Mann. 2001. *Sunbirds: A Guide to the Flowerpeckers, Spiderhunters and*  
417 *Sugarbirds of the World*. Christopher Helm, London, United Kingdom.

- 418 Darwin, C. 1859. The origin of species by means of natural selection: or, the preservation of  
419 favoured races in the struggle for life. John Murray, London
- 420 Dawkins, R. 1997. Human chauvinism. *Evolution* **15**:1015-1020
- 421 Dreisig, H. 1997. Why do some nectar foragers perch and others hover while probing flowers?  
422 *Evolutionary Ecology* **11**:543-555
- 423 Frelich, L.E., C.M. Hale, S. Scheu, A.R. Holdsworth, L. Heneghan, P.J. Bolden, and P.B. Reich.  
424 2006. Earthworm invasion into previously earthworm-free temperate and boreal forests.  
425 *Biological Invasions* **9**:1235-1245
- 426 Galis, F. 2001. Key innovations and radiations. Pages 581-605 in G.P. Wagner. The character  
427 concept in evolutionary biology. Academic Press, San Diego, California, USA
- 428 Graham, G.L. 1983. Changes in bat species diversity along an elevational gradient up the  
429 Peruvian Andes. *Journal of Mammalogy* **64**:559-571
- 430 Hainsworth, F.R. 1973. On the tongue of a hummingbird: its role in the rate and energetics of  
431 feeding. *Comparative Biochemistry and Physiology* **46A**:65-78
- 432 Hainsworth, F.R. 1986. Why hummingbirds hover: a commentary. *The Auk* **103**:832-833
- 433 Halloway, A.H., J.S. Brown, and C.J. Whelan. 201X. The hummingbird and the hawkmoth:  
434 species diversity, competition, and niche partitioning across the United States.  
435 Manuscript
- 436 Hedrick, T.L., B.W. Toblaske, I.G. Ros, D.R. Warrick, and A.A. Biewener. 2012. Morphological  
437 and kinematic basis of the hummingbird flight stroke: scaling of flight muscle  
438 transmission ratio. *Proceedings of the Royal Society B* **279**:1986-1992
- 439 Hillebrand, H. 2004. On the generality of the latitudinal diversity gradient. *The American*  
440 *Naturalist* **163**:192-211

- 441 Holt, R.D., J.H. Lawton, K.J. Gaston, and T.M. Blackburn. 1997. On the relationship between  
442 range size and local abundance: back to basics. *Oikos* **78**:183-190
- 443 Ingram, K. 1978. Hummingbirds and miscellaneous orders (Apodiformes, Caprimulgiformes,  
444 Coliiformes, Trogoniformes, Musophagiformes, and Cuculiformes). Pages 335-346 *in*  
445 Fowler, M.E., editor. *Zoo and Wild Animal Medicine*. W.B. Saunder Company,  
446 Philadelphia, Pennsylvania, USA
- 447 Johnsgard, P.A. 1997. *The Hummingbirds of North America*. Smithsonian Institution Press,  
448 Washington, D.C., USA.
- 449 Karhu, A.A. 1999. A new genus and species of the family Jungornithidae (Apodiformes) from  
450 the Late Eocene of the Northern Caucasus, with comments on the ancestry of  
451 hummingbirds. Pages 207-216 *in* Olson, S.L., P. Wellnhofer, C. Mourer-Chauviré, D.W.  
452 Steadman, and L.D. Martin. *Avian Paleontology at the Close of the 20<sup>th</sup> Century:*  
453 *Proceedings of the 4<sup>th</sup> International Meeting of the Society of Avian Paleontology and*  
454 *Evolution, Washington, D.C, 4-7 June 1996. Smithsonian Contributions to Paleobiology*  
455 **89** Smithsonian Institution Press, Washinton, D.C., USA
- 456 Kaufman, D.M. 1977. Diversity of New World mammals: universality of the latitudinal gradients  
457 of species and bauplans. *Journal of Mammalogy* **76**:322-334
- 458 Kotler, B. and W.A. Mitchell. 1995. The effect of costly information in diet choice. *Evolutionary*  
459 *Ecology* **9**:18-29
- 460 Lima, S.L. 1993. Ecological and evolutionary perspectives on escape from predatory attack: a  
461 survey of North American birds. *The Wilson Bulletin* **105**:1-47
- 462 Mares, M.A. 1975. South American mammal zoogeography: evidence from convergent evolution  
463 in desert rodents. *Proceedings of the National Academy of Sciences* **72**:1702-1706

- 464 McGhee, Jr., G.R. 1981. Evolutionary replacement of ecological equivalents in late Denovian  
465 benthic marine communities. *Paleogeography, Paleoclimatology, Paleoecology* **34**:267-  
466 283
- 467 McGuire, J.A., C.C. Witt, J.V. Remsen Jr., A. Corl, D.L. Rabosky, D.L. Altshuler, and R. Dudley.  
468 2014. Molecular phylogenetics and the diversification of hummingbirds. *Current Biology*  
469 **24**:910-916
- 470 Mooney, H.A. and E.L. Dunn. 1970. Convergent evolution of Mediterranean-climate evergreen  
471 sclerophyll shrubs. *Evolution* **24**:292-303
- 472 Montgomery, W.I. 1989. *Peromyscus* and *Apodemus*: patterns of similarity in ecological  
473 equivalents. Pages 293-366 in Kirkland, G.L. Jr. and J.N. Layne, editors. *Advances in the*  
474 *study of Peromyscus (Rodentia)*. Texas Tech University Press, Lubbock, Texas, USA
- 475 Morhardt, J.E. 1970. Body temperatures of white-footed mice (*Peromyscus* sp.) during daily  
476 torpor. *Comparative Biochemistry and Physiology* **33**:423-439
- 477 Parslew, B. 2015. Predicting power-optimal kinematics of avian wings. *Journal of the Royal*  
478 *Society Interface* **12**: 20140953
- 479 Paton, D.C. and B.G. Collins. 1989. Bills and tongues of nectar-feeding birds: a review of  
480 morphology, function and performance, with intercontinental comparisons. *Australian*  
481 *Journal of Ecology* **14**:473-506
- 482 Pyke, G.H. 1981. Why hummingbirds hover and honeyeaters perch. *Animal Behaviour* **29**:861-  
483 867
- 484 Rico-Guevera, A. and M.A. Rubega. 2011. The hummingbird tongue is a fluid trap, not a  
485 capillary tube. *Proceedings of the National Academy of Sciences* **108**:9356-9360
- 486 Rico-Guevera, A., T. Fan, and M.A. Rubega. 2014. Hummingbird tongues are elastic

- 487 micropumps. *Proceedings of the Royal Society, B* **282**:20151014
- 488 Ros, I.G., L.C. Bassman, M.A. Badger, A.N. Pierson, and A.A. Biewener. 2011. Pigeons steer  
489 like helicopters and generate down- and upstroke lift during low speed turns. *Proceedings*  
490 *of the National Academy of Sciences* **108**:19990-19995
- 491 Rosenzweig, M.L. 1995. *Species diversity in space and time*. Cambridge University Press,  
492 Cambridge, UK.
- 493 Rosenzweig, M.L. and R.D. McCord. 1991. Incumbent replacement: evidence for long-term  
494 evolutionary progress. *Paleobiology* **17**:202-213
- 495 Sánchez-Cordero, V. 2001. Elevation gradients of diversity for rodents and bats in Oaxaca,  
496 Mexico. *Global Ecology and Biogeography* **10**:63-76
- 497 Sanders, N.J. 2002. Elevational gradients in ant species richness: area, geometry, and Rapaport's  
498 rule. *Ecography* **25**:25-32
- 499 Schlamowitz, R., F.R. Hainsworth, and L.L. Wolf. 1976. On the tongues of sunbirds. *The Condor*  
500 **78**:104-107
- 501 Schuchmann, K.L. 1999. Family Trochilidae (Hummingbirds). Pages 468-535 in J. del Hoyo, A.  
502 Elliot, and J. Sargatal, editors. *Handbook of the Birds of the World, Vol.5*. Lynx Edicions,  
503 Barcelona, Spain.
- 504 Terborgh, J. 1977. Bird species diversity on an Andean elevational gradient. *Ecology* **58**:1007-  
505 1019
- 506 Videler, J.J. 2006. *Avian Flight*. Oxford Ornithology Series **14** Oxford University Press, Oxford,  
507 UK
- 508 Vincent, T.L. and J.S. Brown. 2005. *Evolutionary Game Theory, Natural Selection and*  
509 *Darwinian Dynamics*. Cambridge University Press, Cambridge, UK

- 510 Walton, J.B. and J.F. Andrews. 1981. Torpor induced by food deprivation in the Wood mouse  
511 *Apodemus sylvaticus*. Notes from the Mammal Society **42**:260-263
- 512 Warrick, D., T. Hedrick, M.J. Fernández, B. Toblaske, and A. Biewener. 2012. Hummingbird  
513 flight. *Current Biology* **22**:R472-R477
- 514 Wolf, L.L. and F.R. Hainsworth. 1983. Economics of foraging strategies in sunbirds and  
515 hummingbirds. Pages 223-264 *in* Behavioral energetics: the cost of survival in  
516 vertebrates. W.P. Aspey and S.I. Lustick. Ohio State University Press, Columbus, Ohio,  
517 USA
- 518 Yanega, G.M. and M.A. Rubega. 2004. Feeding mechanisms: hummingbird jaw bends to aid  
519 insect capture. *Nature* **428**:615
- 520 Zusi, R.L. 2013. Introduction to the skeleton of hummingbirds (Aves:Apodiformes, Trochilidae)  
521 in function and phylogenetic contests. *Ornithological Monographs* **77**:1-94



522 Table 1a: Proportional species richness per elevation interval of sunbirds and hummingbirds

| <b>Elevation (meters)</b> | <b>Sunbirds</b> | <b>Hummingbirds</b> |
|---------------------------|-----------------|---------------------|
| [ 0 , 500 ]               | 0.967741935     | 0.883040936         |
| ( 500 , 1000 ]            | 1               | 1                   |
| (1000 , 1500 ]            | 0.924731183     | 0.947368421         |
| (1500 , 2000 ]            | 0.677419355     | 0.760233918         |
| (2000 , 2500 ]            | 0.376344086     | 0.543859649         |
| (2500 , 3000 ]            | 0.172043011     | 0.421052632         |
| (3000 , 3500 ]            | 0.107526882     | 0.292397661         |
| (3500 , 4000 ]            | 0.053763441     | 0.140350877         |
| (4000 , 4500 ]            | 0.043010753     | 0.058479532         |
| (4500 , 5000 ]            | 0.021505376     | 0.005847953         |

523

524 Table 1b: Proportional species richness per latitudinal interval of sunbirds and hummingbirds

| <b>Latitude (degrees)</b> | <b>Sunbirds</b> | <b>Hummingbirds</b> |
|---------------------------|-----------------|---------------------|
| [ 0 , 5 ]                 | 0.904761905     | 0.76953125          |
| ( 5 , 10 ]                | 1               | 1                   |
| ( 10 , 15 ]               | 0.80952381      | 0.86328125          |
| ( 15 , 20 ]               | 0.495238095     | 0.6953125           |
| ( 20 , 25 ]               | 0.380952381     | 0.37109375          |
| ( 25 , 30 ]               | 0.314285714     | 0.25                |
| ( 30 , 35 ]               | 0.2             | 0.15234375          |
| ( 35 , 40 ]               | 0.00952381      | 0.05859375          |
| ( 40 , 45 ]               | 0               | 0.03515625          |
| ( 45 , 50 ]               | 0               | 0.02734375          |
| ( 50 , 55 ]               | 0               | 0.0234375           |
| ( 55 , 60 ]               | 0               | 0.01171875          |
| ( 60 , 65 ]               | 0               | 0.00390625          |

525

526 Table 2: The results of the ECDF comparisons between families. *Italics* indicate the centrality  
 527 based ECDFs. **KS** stands for Kolmogorov-Smirnov and **AD** stands for Anderson-Darling. NS  
 528 indicates that the result was non-significant.

| <b>ECDF Type</b>             | <b>Hbird Num</b> | <b>Sbird Num</b> | <b>KS D-statistic</b> | <b>KS Significance</b> | <b>Standardized AD Criterion</b> | <b>AD Significance</b> |
|------------------------------|------------------|------------------|-----------------------|------------------------|----------------------------------|------------------------|
| Minimum Elevation            | 309              | 119              | 0.331783199           | p<0.001                | 31.482                           | p<0.001                |
| Maximum Elevation            | 309              | 119              | 0.163280846           | p<0.05                 | 3.2666                           | p<0.01                 |
| <i>Midpoint Elevation</i>    | 309              | 119              | 0.214598461           | p<0.001                | 8.685                            | p<0.001                |
| Minimum Latitude             | 365              | 124              | 0.234423332           | p<0.001                | 10.207                           | p<0.001                |
| Maximum Latitude             | 365              | 124              | 0.069443217           | NS                     | 0.49404                          | NS                     |
| <i>Midpoint Latitude</i>     | 365              | 124              | 0.156407424           | p<0.05                 | 1.7652                           | p<0.05                 |
| Minimum Polewardness         | 365              | 124              | 0.242222713           | p<0.001                | 14.455                           | p<0.001                |
| Maximum Polewardness         | 365              | 124              | 0.073486522           | NS                     | 0.71488                          | p<0.1                  |
| <i>Midpoint Polewardness</i> | 365              | 124              | 0.14719399            | p<0.05                 | 1.4571                           | p<0.05                 |
| <i>Expected Polewardness</i> | 365              | 124              | 0.13121962            | p<0.05                 | 1.8851                           | p<0.05                 |

529

530 Table 3: The values of  $a$  and  $b$  for each of the models along with their significance. RSS is the  
531 residual sum of squares for each model and RSE is the residual standard error. It should be noted  
532 that all residuals fall between 0 and 1, and therefore the sum of squares are smaller than the sum  
533 of the absolute values of the residuals.

| <b>Model</b> | <b>a</b>             | <b>b</b>             | <b>RSS</b> | <b>RSE</b> |
|--------------|----------------------|----------------------|------------|------------|
| NectarElev   | 0.00655 <sup>d</sup> | 2.40963 <sup>a</sup> | 0.010254   | 0.035802   |
| TrochElev    | 0.02024 <sup>c</sup> | 1.53943 <sup>a</sup> | 0.022979   | 0.053594   |
| NectarLat    | 0.04133 <sup>c</sup> | 0.15735 <sup>a</sup> | 0.04463    | 0.063696   |
| TrochLat     | 0.02318              | 0.17739 <sup>a</sup> | 0.054938   | 0.070671   |

534 <sub>a</sub>:  $p < 0.001$ , <sub>b</sub>:  $p < 0.01$ , <sub>c</sub>:  $p < 0.05$ , <sub>d</sub>:  $p < 0.1$

535 Table 4: The Inflection point, the jerk points, and MMC points for each of the models.

| <b>Model</b> | <b>Inflection</b> | <b>Jerk #1</b> | <b>Jerk #2</b> | <b>Curve #1</b> | <b>Curve #2</b> |
|--------------|-------------------|----------------|----------------|-----------------|-----------------|
| NectarElev   | 2.087005          | 1.540442       | 2.633544       | 1.441369        | 2.73264         |
| TrochElev    | 2.533536          | 1.678043       | 3.389003       | 1.608667        | 3.458399        |
| NectarLat    | 20.24934          | 11.87956       | 28.61911       | 11.872          | 28.62667        |
| TrochLat     | 21.22319          | 13.7989        | 28.64747       | 13.79037        | 28.656          |

536

537 Fig. 1 A plot of the four main ECDFs used to compare hummingbird and sunbird distribution.  
538 Solid lines indicated the sunbirds and dashed lines indicate hummingbirds. One can see that the  
539 hummingbird ECDFs are almost entirely below and reach the 1 at much a higher latitude and  
540 elevation compared to the sunbird ECDFs. One can also see that the deviation between the  
541 elevation-based ECDF is significantly larger than the deviations of the latitudinal based ECDFs.  
542 Fig. 2 A plot of the proportional species richness  $S_p$  of hummingbirds and sunbirds, along with  
543 the fitted line, for elevation (a,c) and latitude (b,d). Hummingbirds are denoted by the triangles  
544 and dashed lines while sunbirds are denoted by the circles and solid lines. One can see that  
545 hummingbirds sustain their species richness at higher elevations and mid-latitudinal ranges, and  
546 extend farther latitudinally than sunbirds. The calculated inflection (non-diagonal cross), jerk  
547 (diagonal cross), and MMC points (asterisks) also are shown for elevation (c) and latitude (d). As  
548 seen in the figures inflection points come later in hummingbirds than sunbirds, confirming that  
549 hummingbirds hold up better than sunbirds. We also see that hummingbird  $S_p$  and sunbird  $S_p$   
550 start their elevational decline at the same spot but eventually separate by the end of the decline,  
551 while with latitude, sunbird  $S_p$  declines earlier but hummingbird  $S_p$  quickly declines until the  
552 declines end at roughly the same point.

553 Fig. 1

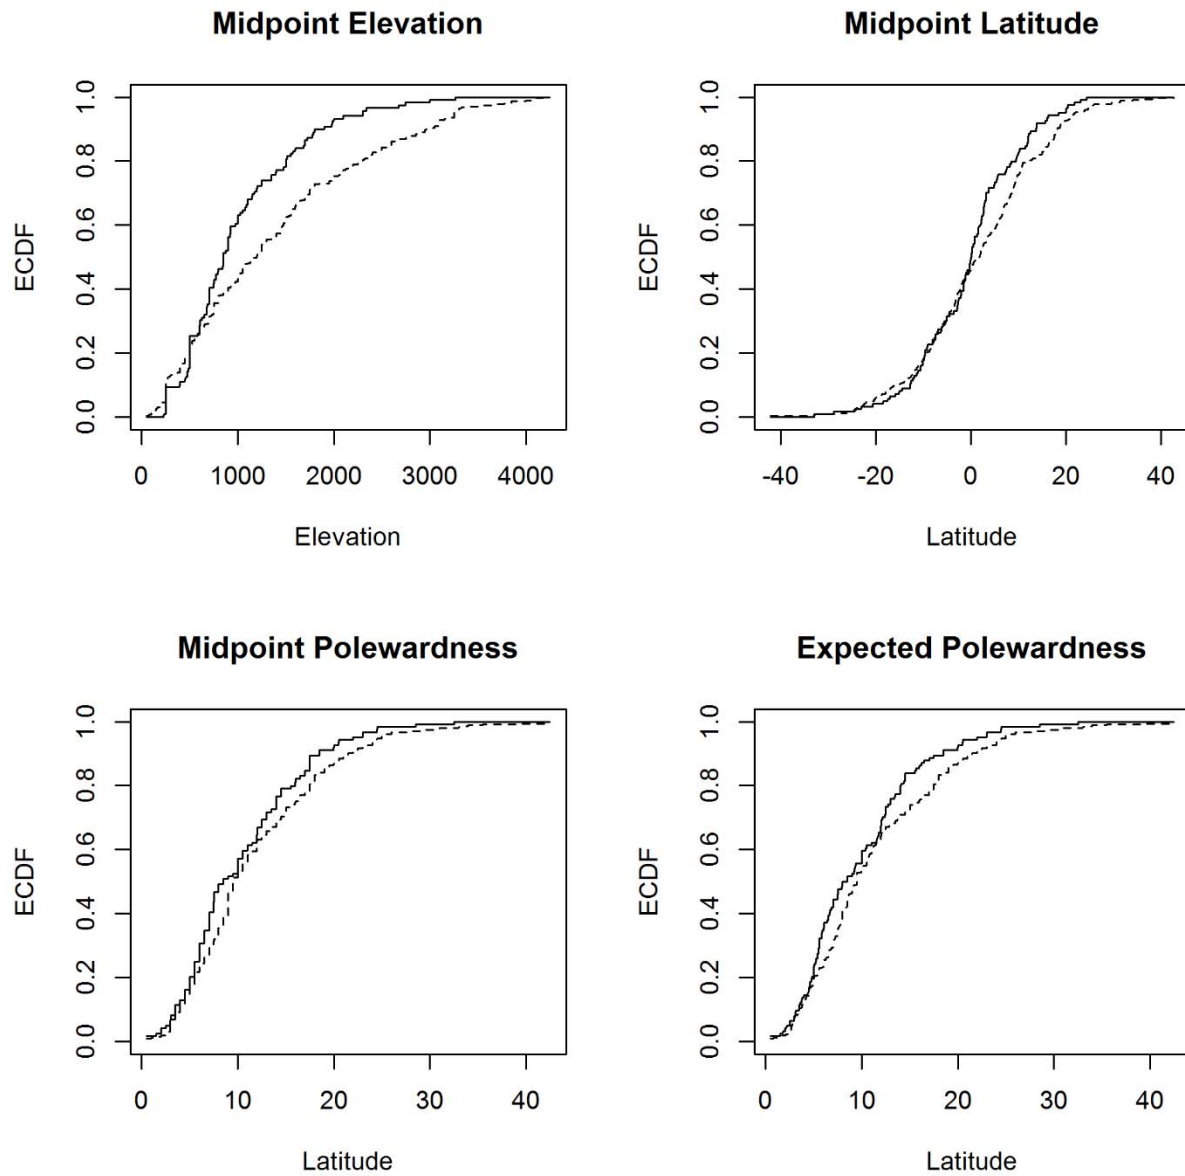

554

555 Fig. 2

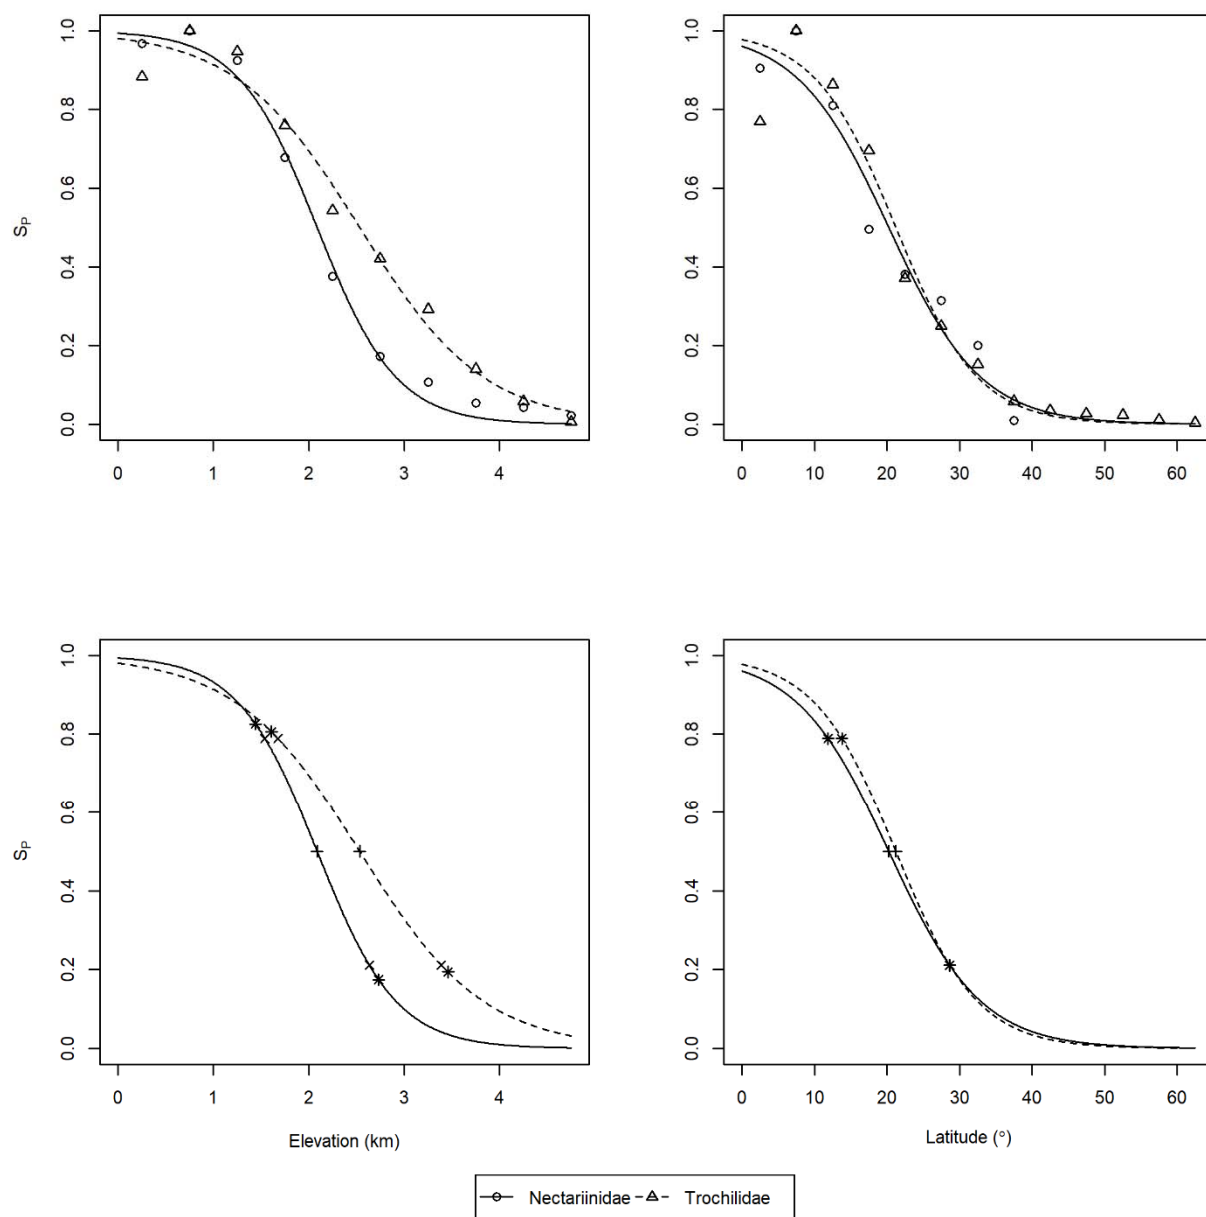

Source: http://biorxiv.org/content/10.1101/214148v1.full.pdf
